# Supplementary material for: Gold/Platinum nanosponges for electrocatalytic oxidation of methanol
Source: Royal Society of Chemistry journal article supplement (doi:10.1039/c0gc00648c), 2011-01-01
Supplement: c0gc00648c.pdf [file c0gc00648c.pdf]

*Supporting Information***Gold/Platinum Nanosponges for Electrocatalytic Oxidation of Methanol**

Zong-Hong Lin, Zih-Yu Shih, Hsiang-Yu Tsai and Huan-Tsung Chang\*

Department of Chemistry, National Taiwan University, Taipei, Taiwan

\*To whom correspondence should be addressed: changht@ntu.edu.tw

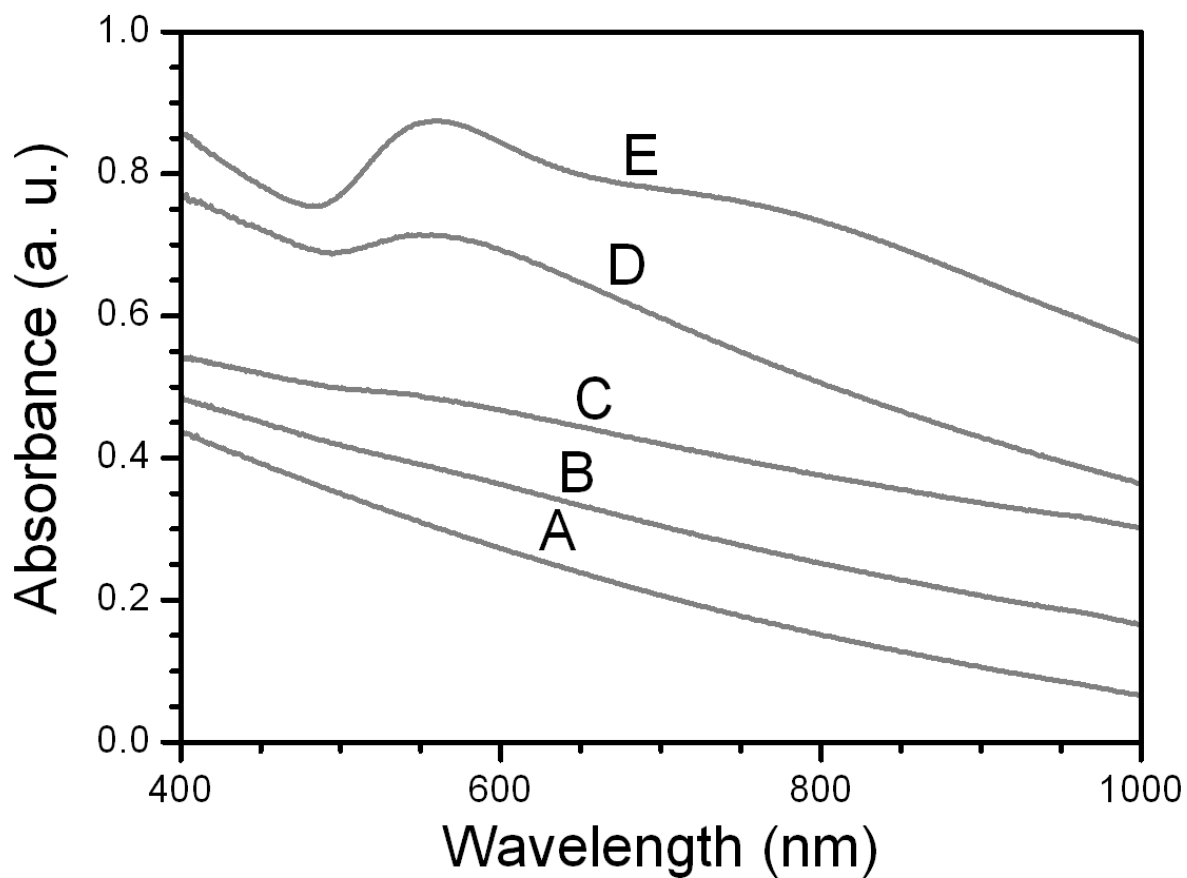

**Fig. S1** UV-Vis absorption spectra of the (A) Pt, (B) Au<sub>0.1</sub>/Pt, (C) Au<sub>0.3</sub>/Pt, (D) Au<sub>0.5</sub>/Pt, and (E) Au<sub>0.8</sub>/Pt nanosponges.

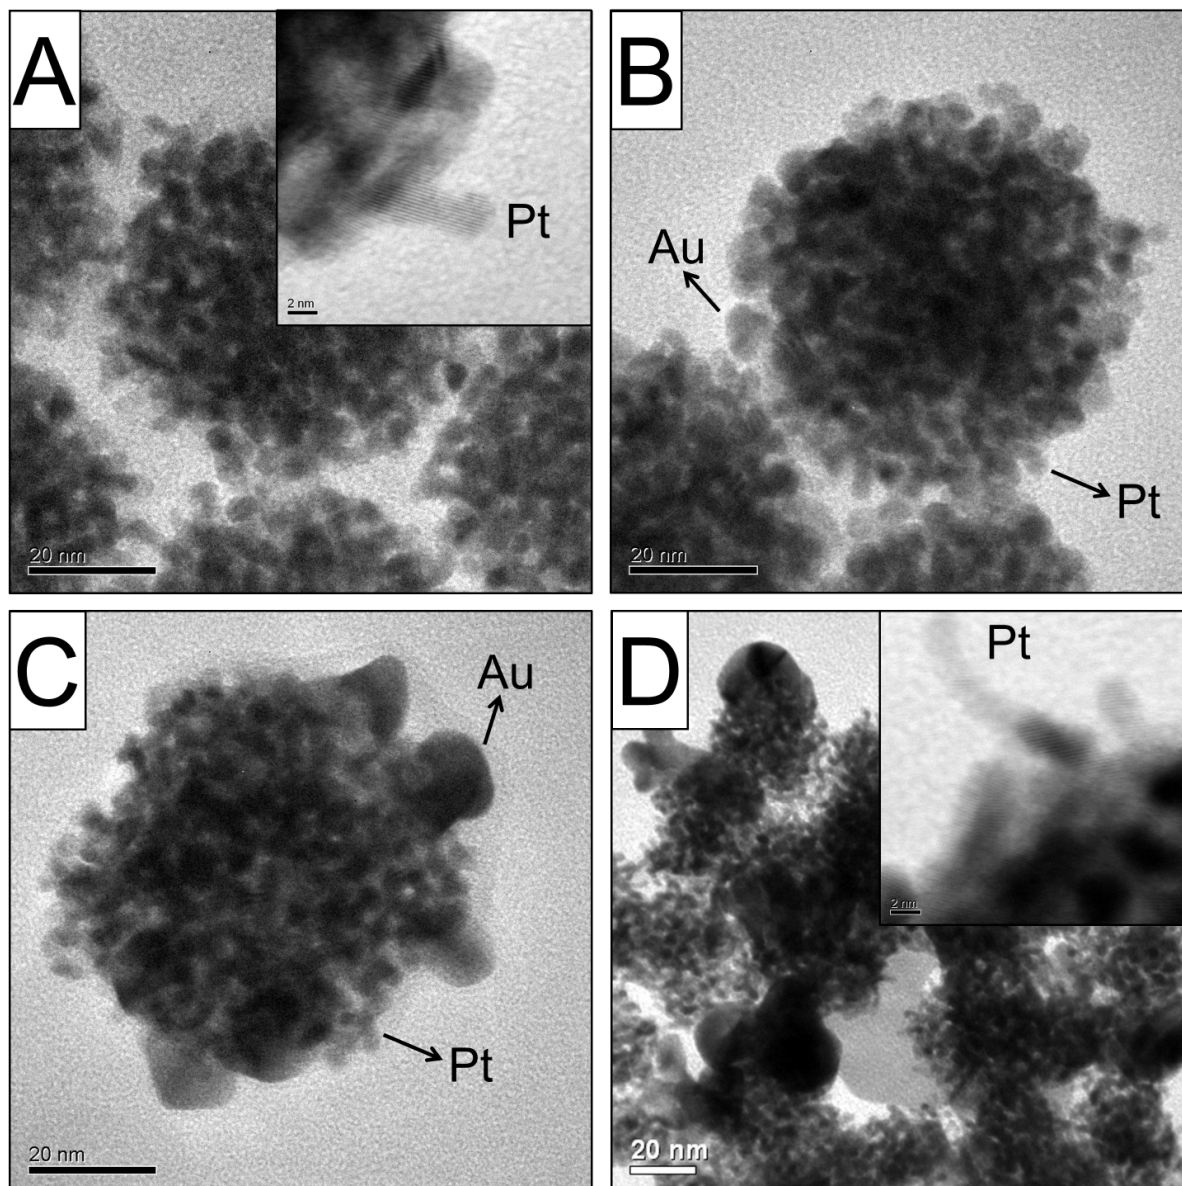

**Fig. S2** Magnified TEM and high-resolution (HR) TEM images of samples obtained from the reactions of Pt nanosponges with  $\text{NaAuCl}_4$  at the concentrations of (A) 0.1, (B) 0.5, (C) 1.0, and (D) 2.0 mM. HRTEM images of  $\text{Au}_{0.1}/\text{Pt}$  and  $\text{Au}_{0.8}/\text{Pt}$  nanosponges (insets to A and D) display that there were no core/shell structures on the Au/Pt nanosponges.

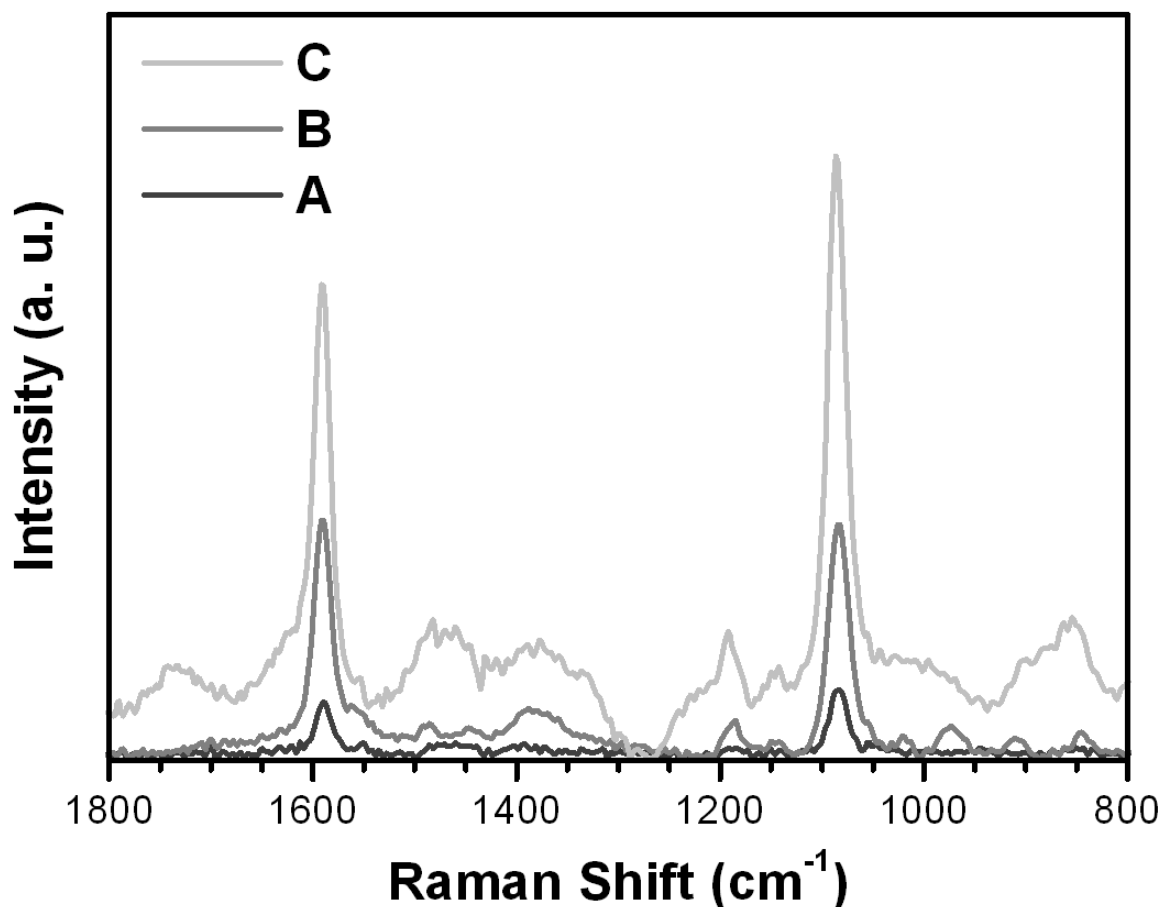

**Fig. S3** (A) SERS spectra of 4-mercaptobenzoic acid (4-MBA) molecules adsorbed onto (A) Pt nanosponges, (B) Au<sub>0.3</sub>/Pt nanosponges, and (C) Au<sub>0.8</sub>/Pt nanosponges; the concentrations of 4-MBA were 10, 1, and 0.1  $\mu\text{M}$  in (A), (B), and (C), respectively. The enhancement factors increased upon increasing the content of Au. The Au<sub>0.8</sub>/Pt nanosponges provided a maximum enhancement factor ( $1.3 \times 10^6$ ).
